# Supplementary material
Source: PubMed Central journal article supplement (PMC2851975)
Supplement: 0914448107_pnas.0914448107_SI.pdf [file 0914448107_pnas.0914448107_SI.pdf]

# Supporting Information

Kanatsu-Shinohara et al. 10.1073/pnas.0914448107

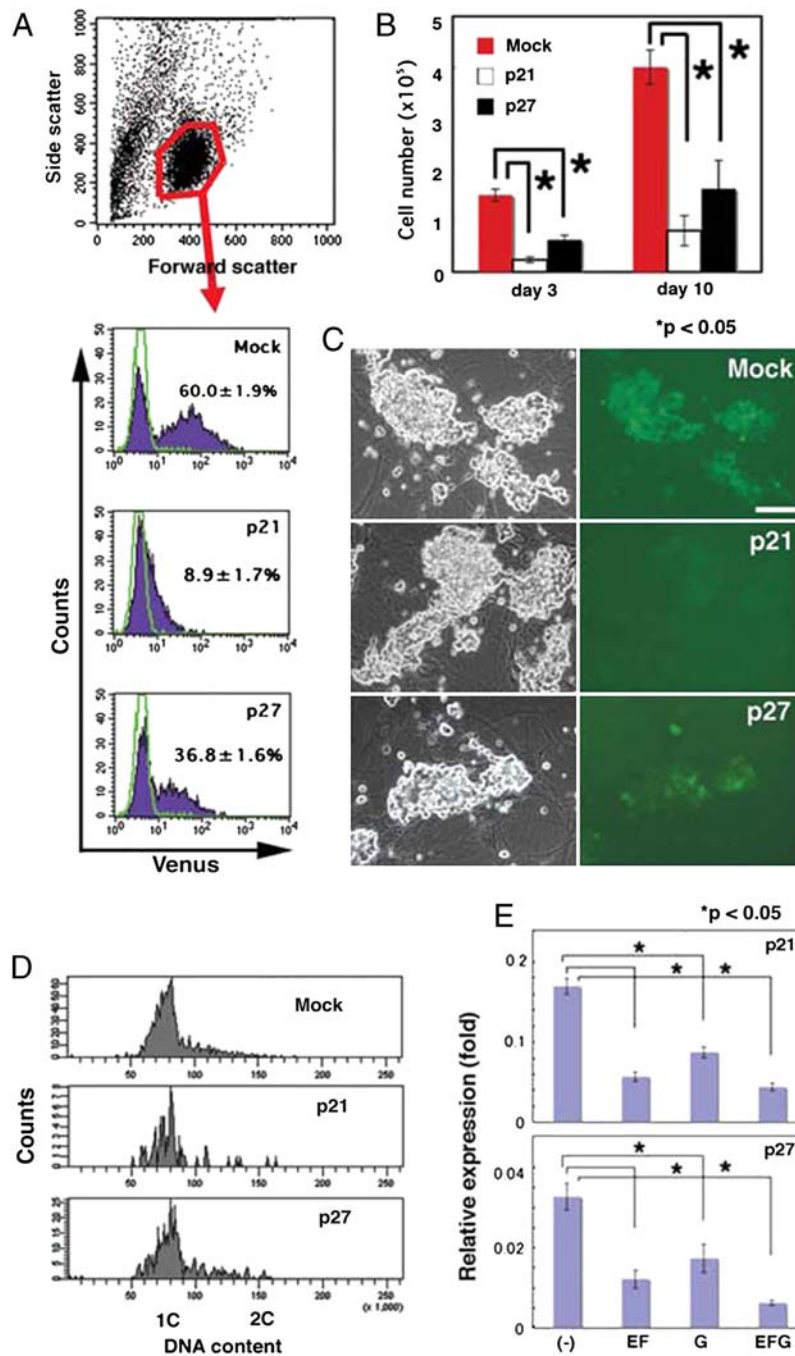

**Fig. S1.** Functional analysis of p21 and p27 genes. (A) Flow cytometric analysis of GS cells at 3 d postinfection by lentiviruses expressing Venus and p21 or p27. Controls are indicated by green lines. (B) Cell recovery after infection. Note the significant reduction in Venus-expressing cells after CDK1 overexpression. (C) Appearance of GS cell colonies at 21 d postinfection. Whereas GS cells transduced with the control empty vector survived and showed fluorescence, Venus-positive cells were selectively lost after p21 overexpression, suggesting loss of SSCs. (D) Cell cycle analysis of Venus<sup>+</sup> GS cells at 3 d postinfection. Note the p21-induced cell cycle arrest. (E) Real-time PCR analysis of p21 and p27 expression in GS cells. GS cells were cultured on laminin for 3 d under the indicated culture conditions. The values were normalized to Hprt1 expression, with expression levels in WT GS cells cultured without cytokines. E, EGF; F, bFGF; G, GDNF. Bar = 100  $\mu$ m (C).

**Table S1. Competition assay**

| Recipient ID | Period to first offspring (days) <sup>*</sup> | Periods of analysis (days) | Litter number | Transgenic offspring/total (%) |
|--------------|-----------------------------------------------|----------------------------|---------------|--------------------------------|
| p21          |                                               |                            |               |                                |
| D            | 117                                           | 230                        | 7             | 52/52 (100.0)                  |
| E            | 101                                           | 304                        | 14            | 93/95 (97.9)                   |
| I            | 139                                           | 304                        | 10            | 61/65 (93.8)                   |
| Total        |                                               |                            | 31            | 206/212 (97.2)                 |
| p27          |                                               |                            |               |                                |
| H            | 89                                            | 195                        | 7             | 10/49 (20.4)                   |
| U            | 153                                           | 205                        | 5             | 2/35 (5.7)                     |
| V            | 124                                           | 169                        | 3             | 0/14 (0.0)                     |
| Total        |                                               |                            | 15            | 12/98 (12.2)                   |

<sup>\*</sup>Days from transplantation to the birth of first offspring are shown.

**Table S2. Summary of serial transplantation**

| Donor mouse ID |   | No. of colonies dissected out <sup>*</sup> | No. of colonies serially transplanted <sup>†</sup> | No. of colonies regenerated <sup>‡</sup> | Increase in colony number | Multiplication of colony <sup>§</sup> |
|----------------|---|--------------------------------------------|----------------------------------------------------|------------------------------------------|---------------------------|---------------------------------------|
| WT             |   |                                            |                                                    |                                          |                           |                                       |
| 1              | R | 10                                         | 7.5                                                | 18                                       | 10.5                      | 24                                    |
|                | L | 10                                         | 8.0                                                | 7                                        | -1.0                      | 9                                     |
| 2              | R | 13                                         | 10.4                                               | 15                                       | 4.6                       | 14                                    |
|                | L | 10                                         | 8.0                                                | 14                                       | 6.0                       | 18                                    |
| 3              | R | 9                                          | 7.2                                                | 9                                        | 1.8                       | 13                                    |
|                | L | 12                                         | 9.6                                                | 21                                       | 11.4                      | 22                                    |
| 4              | R | 7                                          | 5.6                                                | 11                                       | 5.4                       | 20                                    |
|                | L | 5                                          | 3.5                                                | 14                                       | 10.5                      | 40                                    |
| 5              | R | 12                                         | 9.6                                                | 58                                       | 48.4                      | 60                                    |
|                | L | 12                                         | 9.6                                                | 45                                       | 35.4                      | 47                                    |
| 6              | R | 6                                          | 4.8                                                | 12                                       | 7.2                       | 25                                    |
|                | L | 6                                          | 4.8                                                | 22                                       | 17.2                      | 46                                    |
| 7              | R | 5                                          | 2.7                                                | 10                                       | 7.3                       | 37                                    |
|                | L | 12                                         | 6.0                                                | 21                                       | 15.0                      | 35                                    |
| p21 KO         |   |                                            |                                                    |                                          |                           |                                       |
| 1              | R | 2                                          | 0.5                                                | 5                                        | 4.5                       | 94                                    |
|                | L | 4                                          | 3.2                                                | 4                                        | 0.8                       | 13                                    |
| 2              | R | 3                                          | 2.4                                                | 10                                       | 7.6                       | 42                                    |
|                | L | 3                                          | 2.4                                                | 4                                        | 1.6                       | 17                                    |
| 3              | R | 6                                          | 4.5                                                | 10                                       | 5.5                       | 22                                    |
|                | L | 3                                          | 2.3                                                | 1                                        | 1.3                       | 4                                     |
| 4              | R | 9                                          | 6.8                                                | 12                                       | 5.2                       | 18                                    |
|                | L | 9                                          | 7.2                                                | 24                                       | 16.8                      | 33                                    |
| 5              | R | 5                                          | 3.8                                                | 12                                       | 8.2                       | 32                                    |
|                | L | 7                                          | 5.6                                                | 7                                        | 1.4                       | 13                                    |
| 6              | R | 10                                         | 7.5                                                | 12                                       | 4.5                       | 16                                    |
|                | L | 5                                          | 4.0                                                | 5                                        | 1.0                       | 13                                    |
| 7              | R | 8                                          | 6.4                                                | 14                                       | 7.6                       | 22                                    |
|                | L | 5                                          | 4.0                                                | 13                                       | 9.0                       | 33                                    |
| p27 KO         |   |                                            |                                                    |                                          |                           |                                       |
| 1              | R | 4                                          | 2.3                                                | 3                                        | 0.7                       | 13                                    |
|                | L | 5                                          | 3.3                                                | 0                                        | -3.3                      | 0                                     |
| 2              | R | 9                                          | 7.2                                                | 0                                        | -7.2                      | 0                                     |
|                | L | 9                                          | 7.2                                                | 3                                        | -4.2                      | 4                                     |
| 3              | R | 11                                         | 8.8                                                | 3                                        | -5.8                      | 3                                     |
|                | L | 6                                          | 4.8                                                | 3                                        | -1.8                      | 6                                     |
| 4              | R | 7                                          | 5.6                                                | 3                                        | -2.6                      | 5                                     |
|                | L | 7                                          | 5.6                                                | 2                                        | -3.6                      | 4                                     |
| 5              | R | 8                                          | 6.4                                                | 4                                        | -2.4                      | 6                                     |
|                | L | 7                                          | 5.6                                                | 8                                        | 2.4                       | 14                                    |
| 6              | R | 3                                          | 2.4                                                | 4                                        | 1.6                       | 17                                    |
|                | L | 7                                          | 3.2                                                | 5                                        | 1.8                       | 16                                    |
| 7              | R | 3                                          | 3.8                                                | 0                                        | -3.8                      | 0                                     |
|                | L | 5                                          | 4.0                                                | 5                                        | 1.0                       | 13                                    |

R, right testis, L, left testis.

<sup>\*</sup>The number of germ cell colonies that were used for serial transplantation.

<sup>†</sup>The number of colonies transplanted into the next recipient mice, calculated by comparing the volume of cell suspension prepared and those actually introduced into the recipient testes.

<sup>‡</sup>The resultant colony number in the recipient mice in total.

<sup>§</sup>(Regenerated colony number)×10/number of colonies serially transplanted.

**Table S3. PCR primers used for real-time PCR**

| Primer             | Sequence                     |
|--------------------|------------------------------|
| p21 Forward        | 5'-GCAGATCCACAGCGATATCC-3'   |
| p21 Reverse        | 5'-CAACTGCTCACTGTCCACGG-3'   |
| p27 Forward        | 5'-AAGGGCCAACAGAACAGAAG-3'   |
| p27 Reverse        | 5'-GGATGTCCATTCAATGGAGTC-3'  |
| E-cadherin Forward | 5'-ACCGATTCAAGAAGCTGGC-3'    |
| E-cadherin Reverse | 5'-ACCATCCTAACACAGACAGTCC-3' |
| PLZF Forward       | 5'-CACACTCAAGAGCCACAAGC-3'   |
| PLZF Reverse       | 5'-ATCATGGCCGAGTAGTCTCG-3'   |
| Hprt1 Forward      | 5'-GCTGGTGAAAAGGACCTC-3'     |
| Hprt1 Reverse      | 5'-CACAGGACTAGAACACCTGC-3'   |

**Table S4. PCR primers used for genotyping**

| Primer    | Sequence                       |
|-----------|--------------------------------|
| p21+116F  | 5'-AAGCCTTGATTCTGATGTGGGC-3'   |
| p21-135   | 5'-TGACGAAGTCAAAGTCCACCG-3'    |
| Neo 19+   | 5'-GCTATCAGGACATAGCGTTGGC-3'   |
| p27ex1-5' | 5'-CCTGGAGCGGCTGGACGCCAGACA-3' |
| p27ex1-3' | 5'-CACCAAATGCCGGTCTCAGAGTT-3'  |
| BK1       | 5'-GGCTATTGGCTCAAAACGAACCTC-3' |
| MK4       | 5'-ATGCTCCAGACTGCCTTGGGAAAA-3' |

For genotyping of p21 KO mice, approximately 900 bp band is amplified with p21 + 116F and p21 – 135 primers, and approximately 759 bp is amplified with p21 + 116F and Neo 19+ primers. For genotyping of p27 KO mice, 350 bp band is amplified with p27ex1-5' and p27ex1-3' primers, and 380 bp band is amplified with BK1 and MK4 primers.
